# Supplementary material for: Unlocking the Secondary Critical Raw Material Potential of Historical Mine Sites, Lousal Mine, Southern Portugal
Source: MDPI journal article supplement (doi:10.3390/min14020127), 2024-01-24

**Table S2. XRD spectra of bulk samples.**

**LOUS/GSEU/001 - Bulk sample**

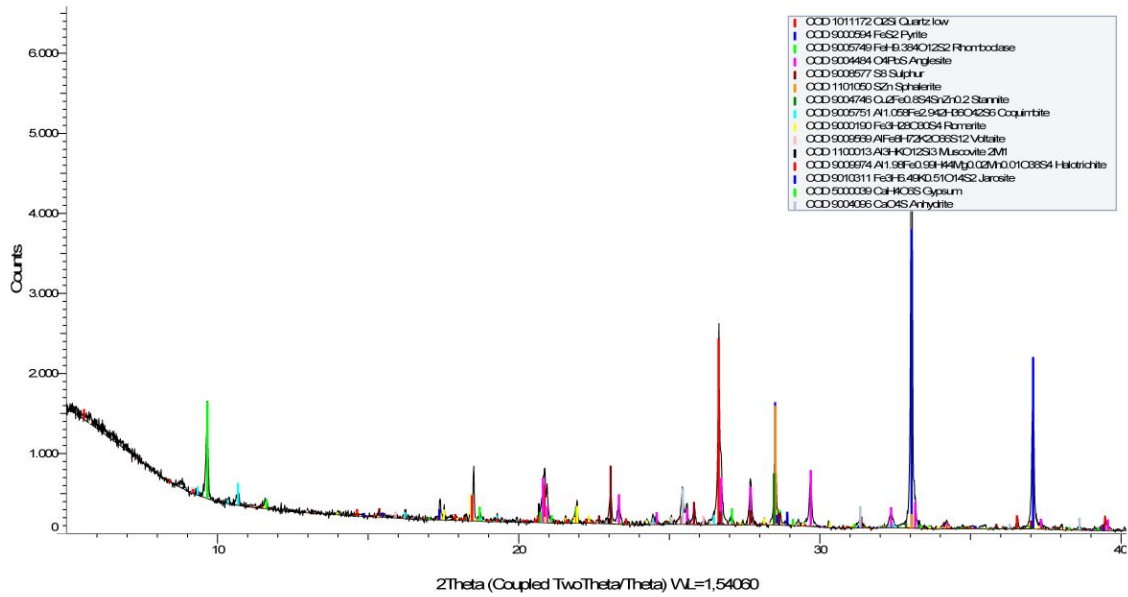

**LOUS/GSEU/002 - Bulk sample**

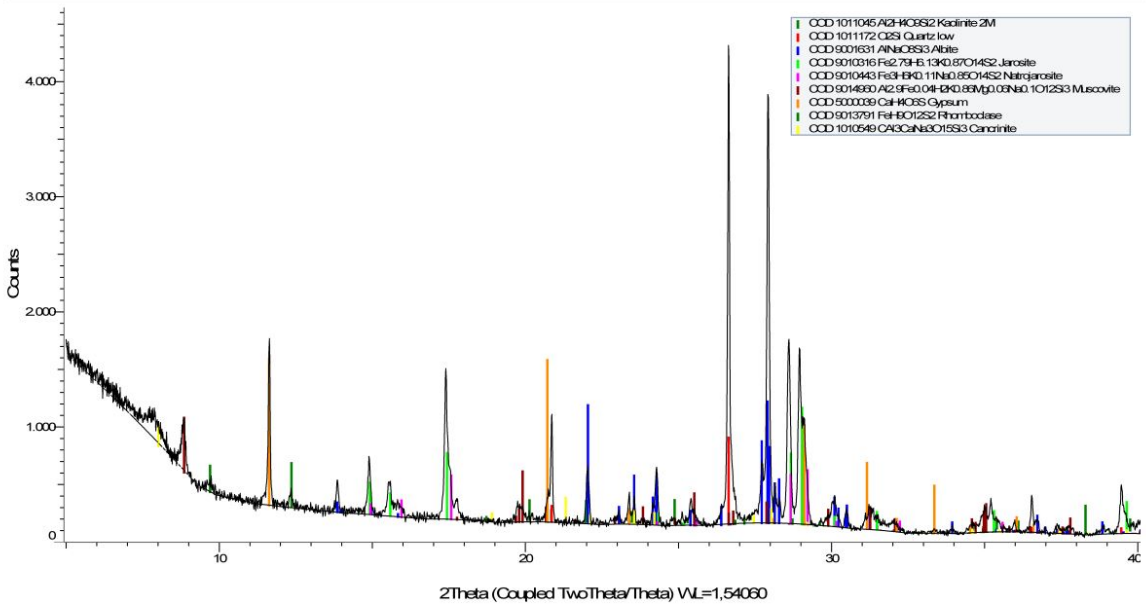

# LOUS/GSEU/003 - Bulk sample

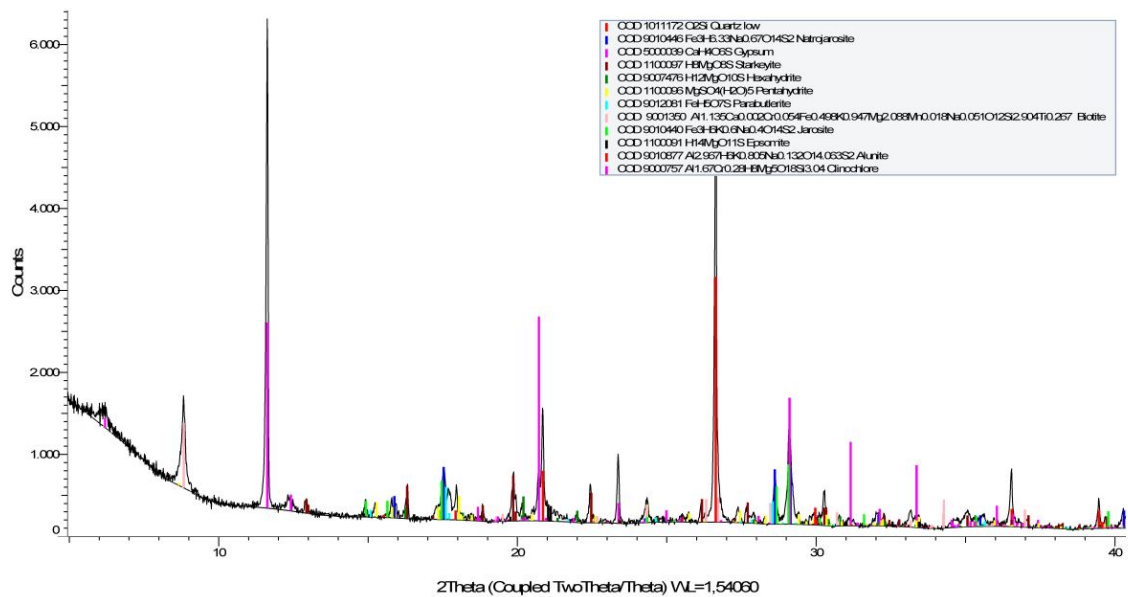

# LOUS/GSEU/004 - Bulk sample

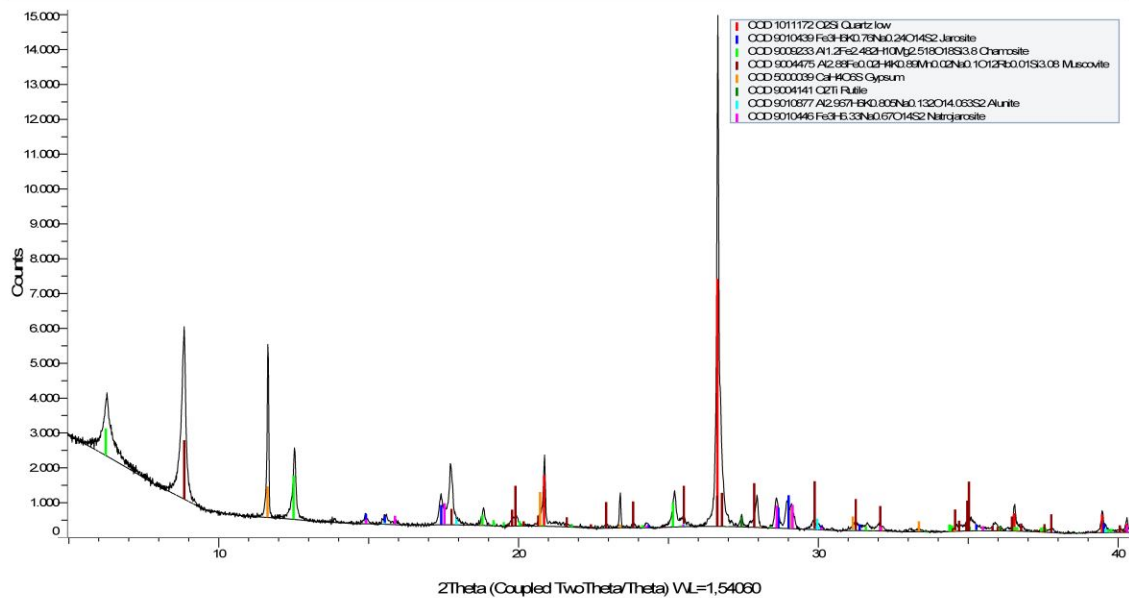

# LOUS/GSEU/006 - Bulk sample

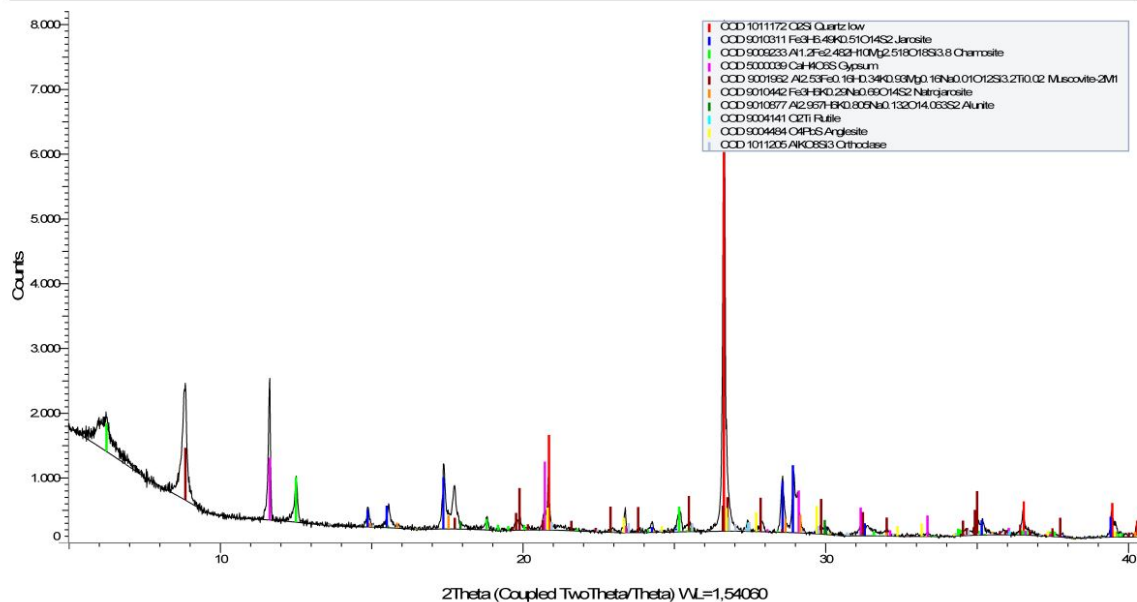

# LOUS/GSEU/007 - Bulk sample

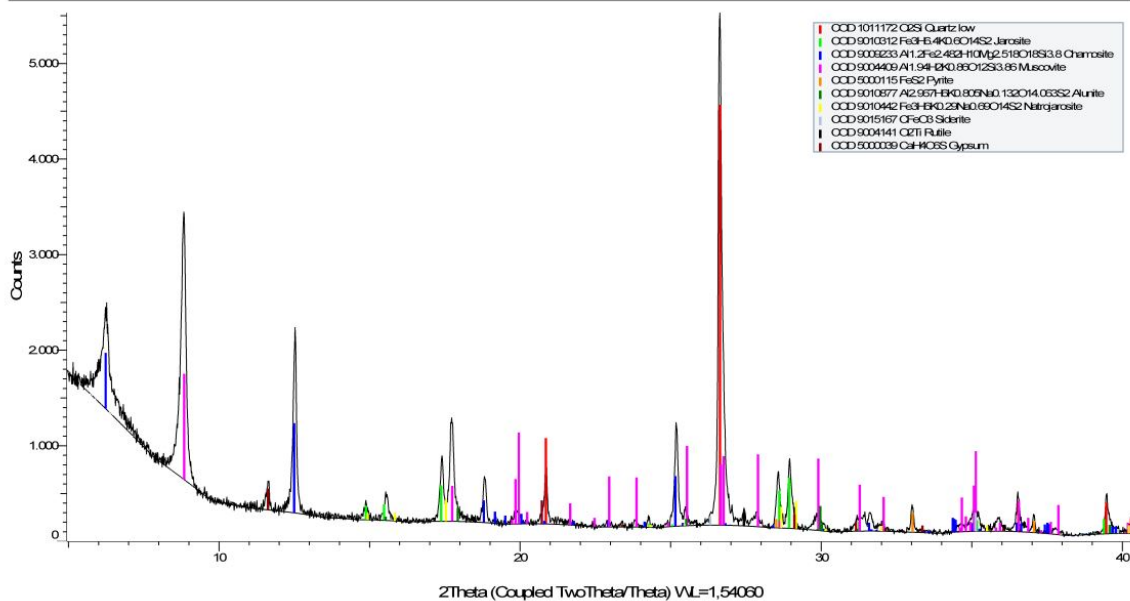

# LOUS/GSEU/008 - Bulk sample

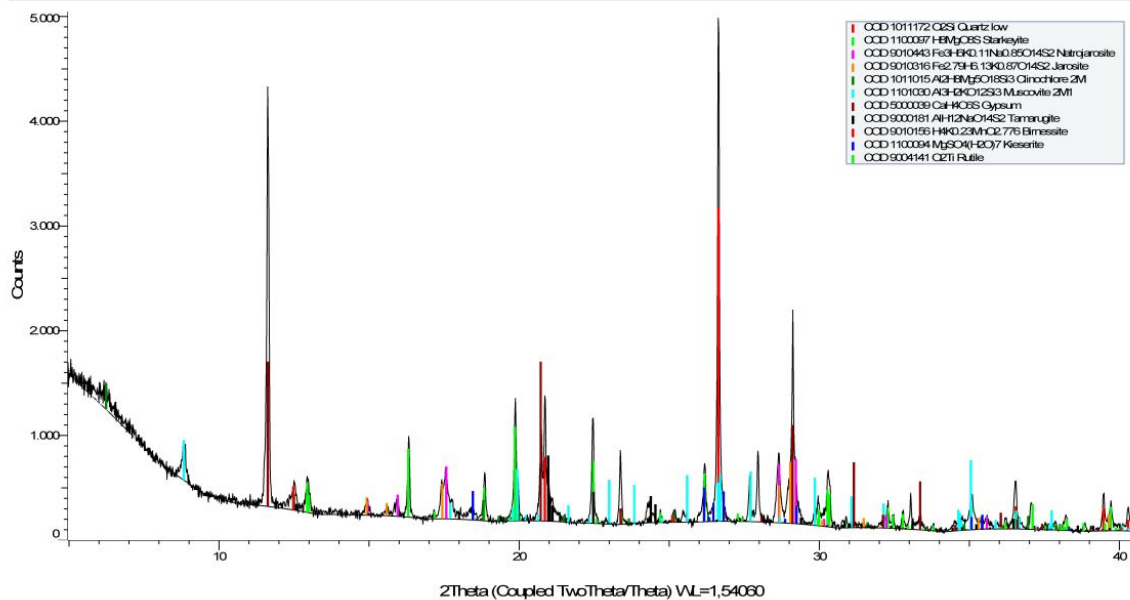

# LOUS/GSEU/009 - Bulk sample

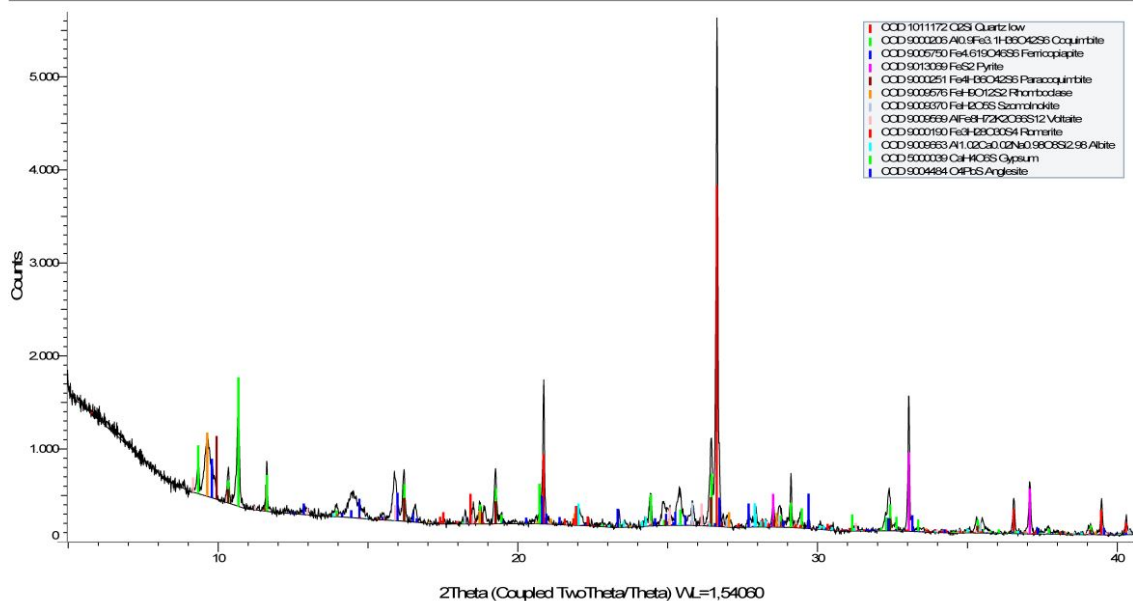

# LOUS/GSEU/0010 - Bulk sample

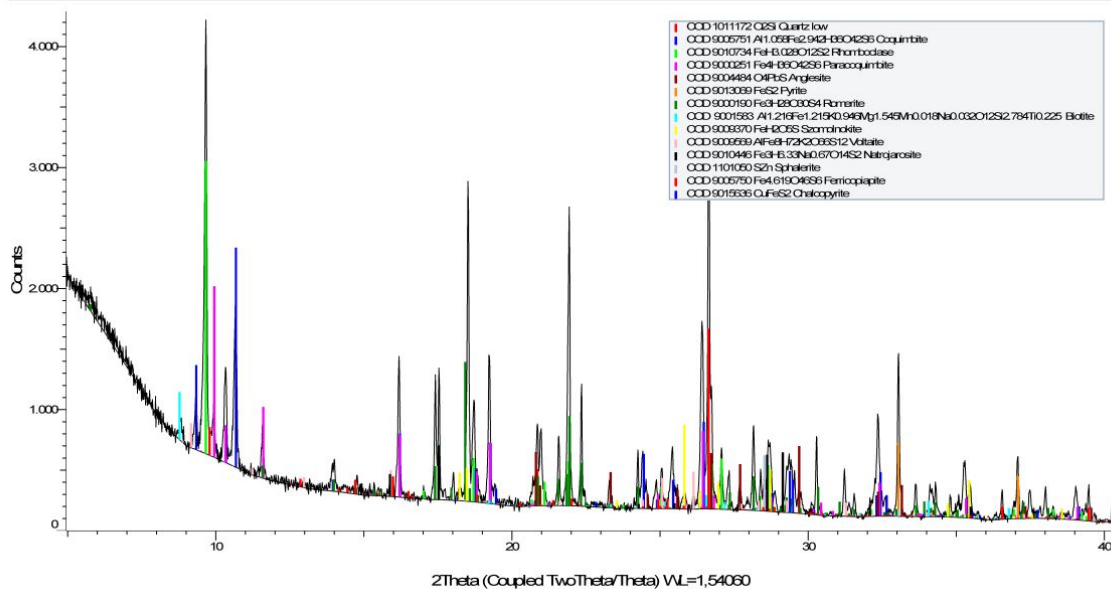

# LOUS/GSEU/0011 - Bulk sample

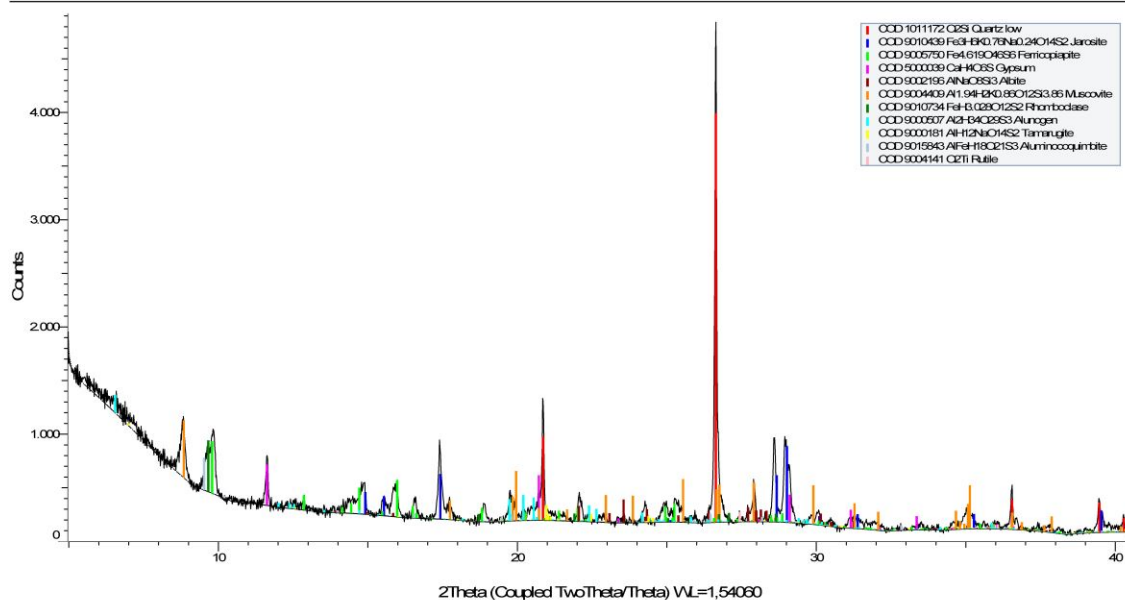

# LOUS/GSEU/0012 - Bulk sample

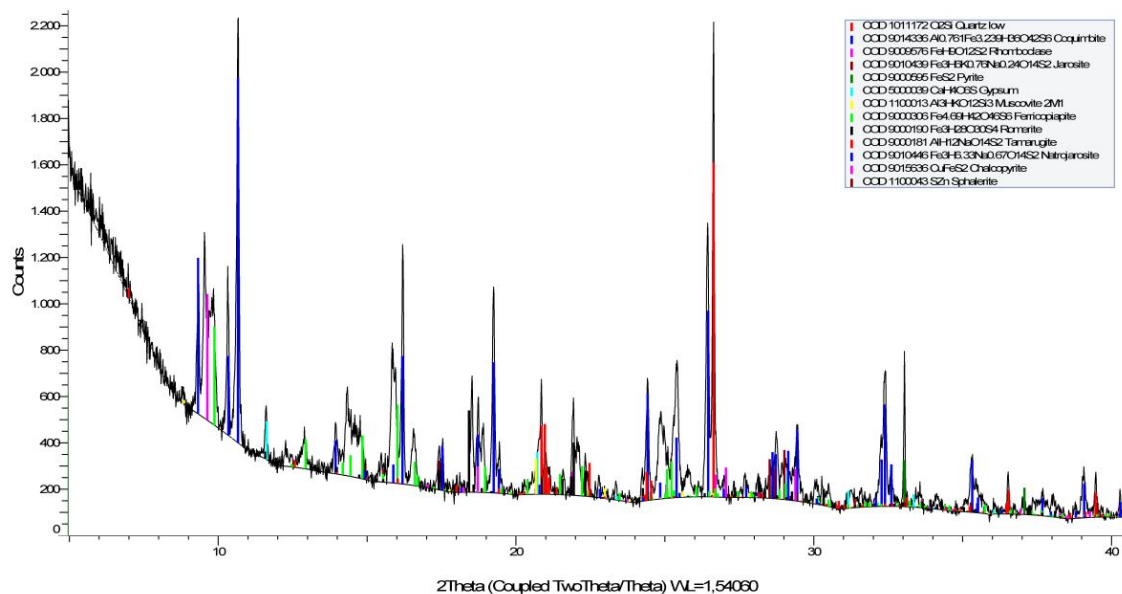

# LOUS/GSEU/0013 - Bulk sample

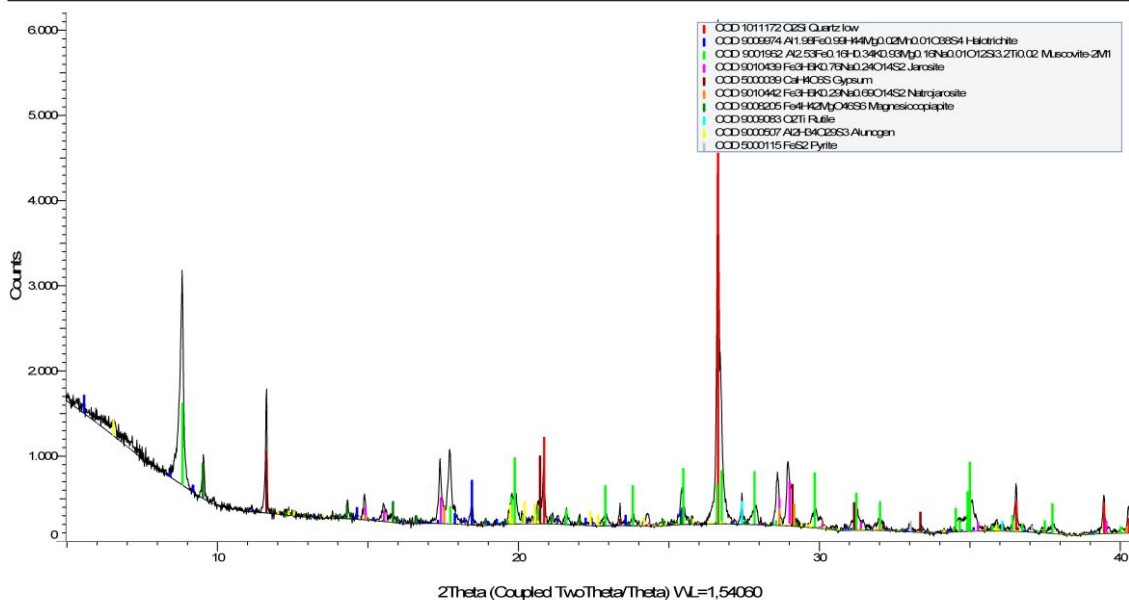

LOUS/GSEU/0014 - Bulk sample

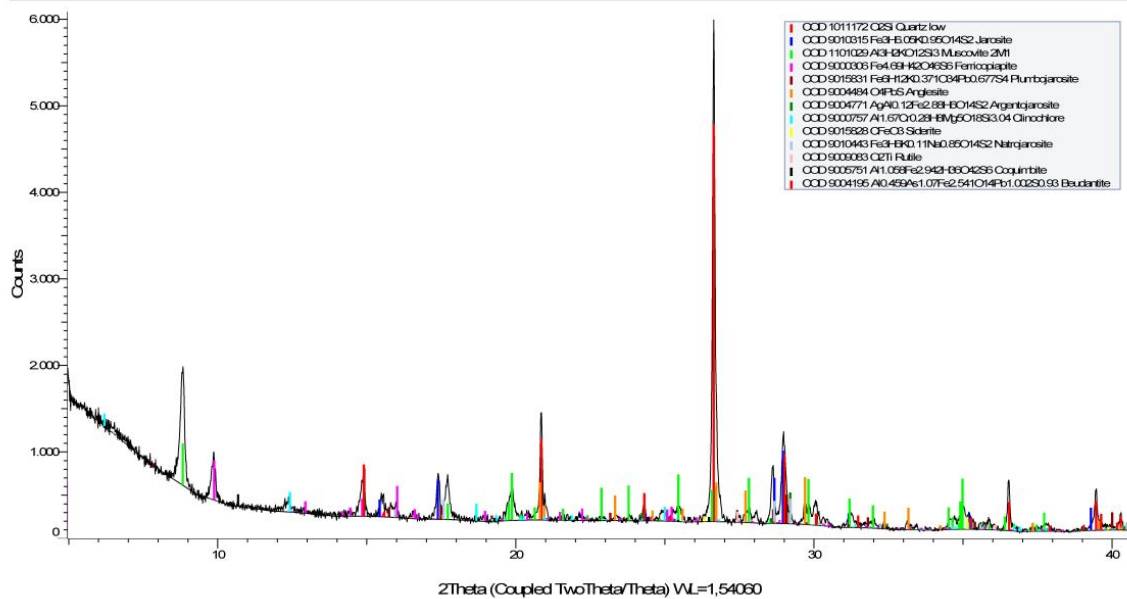

Supplement: s1 [file s1]
